# Supplementary material
Source: HighWire-hosted journal article supplement (http://www.qdcxjkg.com/highwire/filestream/113615/field_highwire_adjunct_files/4/supplemental_material_e2.pdf)
Supplement: supplemental_material_e2.pdf [file supplemental_material_e2.pdf]

## **Supplemental Material E2**

### **Sub-analysis in patients without known type 2 diabetes**

Similar to the total sample, OSA subjects had higher age, WC and NC and reported more sleep hours per night. Also they had higher BMI ( $47 \pm 6$  vs  $45 \pm 5$  Kg/m<sup>2</sup>, p 0.039) (Table e-1).

The prevalence of MetS and the metabolic profile tend to progressively worsens with increasing AHI categories but some metabolic parameters (TG, FBG, cLDL, cVLDL) loose statistically significance (Table e-2). Furthermore, the Framingham Cardiac Risk Score increased with OSA categories (Figure e-1).

The adjusted linear regression analysis showed that AHI was associated with SBP, cHDL and HbA1c; by contrast, Time SpO<sub>2</sub> < 90% was only associated with Hb1Ac (Table e-3).
